# Supplementary material for: Highly efficient and scalable chemoenzymatic syntheses of (R)- and (S)-lactaldehydes
Source: Royal Society of Chemistry journal article supplement (doi:10.1039/c5re00009b), 2015-11-06

*Supporting Information*

**Highly Efficient and Scalable Chemoenzymatic Syntheses of (R)- and (S)-Lactaldehydes**

Michael A. K. Vogel<sup>a</sup>, Hanspeter Burger<sup>a</sup>, Nadin Schläger<sup>a</sup>, Roland Meier<sup>a</sup>, Bernhard Schönenberger<sup>a</sup>,  
Tom Bisschops<sup>b</sup>, Roland Wohlgemuth<sup>a\*</sup>

<sup>a</sup> Sigma-Aldrich, Industriestrasse 25, CH-9470 Buchs, Switzerland  
[phone: +41-81-7552640, fax: +41-81-7552840, e-mail: roland.wohlgemuth@sial.com]

<sup>b</sup> Sigma-Aldrich, Riedstrasse 2, 89555 Steinheim, Germany

Table of contents

1. Screening of ketoreductases
2. Scale-up of ketoreductase-catalyzed reduction of Methylglyoxal-1,1-dimethylacetal
3. GC of (S)-1,1-Dimethoxy-2-propanol
4. NMR of (S)-1,1-Dimethoxy-2-propanol
5. Enantiomeric purity analysis of (S)- and (R)-1,1-Dimethoxy-2-propanol by GC
6. <sup>1</sup>H-NMR of (R)-Lactaldehyde
7. Stability of (R)-Lactaldehyde by <sup>1</sup>H-NMR, signal of methyl group
8. <sup>13</sup>C-NMR of (R)-Lactaldehyde
9. Enantiomeric purity analysis of (S)- and (R)-lactaldehyde as its dinitrophenylhydrazone derivatives by HPLC
10. DoE Parameter Investigation

### 1. Screening of ketoreductases

| sample                                  | enzyme no.<br>from kit | rel. peak area:<br>starting<br>ketone | rel. peak area: sum of<br>enantiomeric hydroxy<br>compounds | enantiomeric ratio:<br>1 <sup>st</sup> : 2 <sup>nd</sup> eluting<br>enantiomer |
|-----------------------------------------|------------------------|---------------------------------------|-------------------------------------------------------------|--------------------------------------------------------------------------------|
| T23247-001                              | 1                      | 0%                                    | 100%                                                        | 67.6 : 32.4                                                                    |
| T23247-002                              | 2                      | 0%                                    | 100%                                                        | 12.6 : 87.4                                                                    |
| T23247-003                              | 3                      | 0%                                    | 100%                                                        | 0.5 : 99.5                                                                     |
| T23247-004                              | 4                      | 0%                                    | 100%                                                        | 0.0 : 100.0                                                                    |
| T23247-005                              | 5                      | 0%                                    | 100%                                                        | 99.0 : 1.0                                                                     |
| T23247-006                              | 6                      | 0%                                    | 100%                                                        | 100.0 : 0.0                                                                    |
| T23247-007                              | 7                      | 0%                                    | 100%                                                        | 98.8 : 1.2                                                                     |
| T23247-008                              | 8                      | 10.2%                                 | 89.8%                                                       | 86.9 : 13.1                                                                    |
| T23247-009                              | 9                      | 0%                                    | 100%                                                        | 100.0 : 0.0                                                                    |
| T23247-010                              | 10                     | 0%                                    | 100%                                                        | 100.0 : 0.0                                                                    |
| T23247-011                              | 11                     | 0%                                    | 100%                                                        | 70.1 : 29.9                                                                    |
| T23247-012                              | 12                     | 0%                                    | 100%                                                        | 71.3 : 28.7                                                                    |
| T23247-013                              | 13                     | 0%                                    | 100%                                                        | 99.5 : 0.5                                                                     |
| T23247-014                              | 14                     | 0%                                    | 100%                                                        | 51.8 : 48.2                                                                    |
| T23247-015                              | 15                     | 0%                                    | 100%                                                        | 69.1 : 30.9                                                                    |
| T23247-016                              | 16                     | 0%                                    | 100%                                                        | 100.0 : 0.0                                                                    |
| T23247-017                              | 17                     | 0%                                    | 100%                                                        | 84.7 : 15.3                                                                    |
| T23247-018                              | 18                     | 0%                                    | 100%                                                        | 94.6 : 5.4                                                                     |
| T23247-019                              | 19                     | 0%                                    | 100%                                                        | 95.4 : 4.6                                                                     |
| T23247-020                              | 20                     | 0%                                    | 100%                                                        | 100.0 : 0.0                                                                    |
| T23247-021                              | 21                     | 0%                                    | 100%                                                        | 100.0 : 0.0                                                                    |
| T23247-022                              | 22                     | 0%                                    | 100%                                                        | 0.0 : 100.0                                                                    |
| T23247-023                              | 23                     | 0%                                    | 100%                                                        | 72.9 : 27.1                                                                    |
| T23247-024                              | 24                     | 0%                                    | 100%                                                        | 0.8 : 99.2                                                                     |
| T23247-025:<br>starting material (ref.) |                        | 100%                                  | 0%                                                          | -                                                                              |
| T23247-026:<br>racemic product (ref.)   |                        | 0%                                    | 100%                                                        | 50.2 : 49.8                                                                    |

Enzyme screening: Starting conditions of the screening were given by a loading of substrate 3 of 6 g/L, KRED loading of 1 g/L and a NADPH loading of 0.8 g/L in potassium phosphate buffer of pH=7. The screening reactions were conducted in 5mL glass vials, placed in heating blocks of a magnetic stirrer at 30°C. The reaction course was monitored by TLC (silicagel, AcOEt:Heptane=1:1, Phosphomolybdic acid solution, heat to 120°, starting material hardly visible) and conversion and enantiomeric ratio were determined by GC (SupelcoWax 10 capillary GC column 30m x 0.25mm and  $\beta$ -Dex 110 column 30m x 0.25mm respectively) (see section 3 of the supporting information)

### 3. Scale-up of ketoreductase-catalyzed reduction of Methylglyoxal-1,1-dimethylacetal

Preparation of 0.1M  $\text{KH}_2\text{PO}_4$ -buffer solution (pH = 6.9-7.1): 473mL of 0.25M  $\text{K}_2\text{HPO}_4$ -solution (prepared from 34.85g (0.2 mol)  $\text{K}_2\text{HPO}_4$  and 800mL deionized water, pH = 9.25) and 296mL of 0.25M  $\text{KH}_2\text{PO}_4$ -solution (prepared from 17.01g (0.12mol)  $\text{KH}_2\text{PO}_4$ , 305mg (2.53mmol) magnesium sulfate and 500mL deionized water, pH = 4.4) were added to 1154mL of deionized water at 20-30°C.

Preparation of (R)-1,1-Dimethoxy-2-propanol: 1960g 0.1M  $\text{KH}_2\text{PO}_4$ -buffer solution was placed in a 6.0L reaction flask, equipped with overhead stirring. 474.6g (4.018 mol) Methylglyoxal-1,1-dimethylacetal dissolved in 348g IPA, and 261mg (0.341 mol) NADP<sup>+</sup> dissolved in 22g 0.1M  $\text{KH}_2\text{PO}_4$ -buffer solution were subsequently added to the flask. A solution of 3.01g KRED-P2-G03 in 150g 0.1M  $\text{KH}_2\text{PO}_4$ -buffer solution was added to start the reaction, applying gentle stirring at  $\leq 100$  rpm. With completed addition the reaction mixture was heated to 30 °C and stirred for 24 h. To the turbid solution 750g MTBE were added. The organic layer was saturated with 700 g sodium chloride and stirred for 30 min at 20-30°C. The reaction mixture was transferred into a separating funnel and further 3.5kg MTBE were added. After extraction, the layers were separated and the aqueous layer further extracted with 3 x 4kg MTBE. The combined organic layers were dried over 400g  $\text{MgSO}_4$ , the solid filtered off and washed two times with 100g MTBE. The solvents were evaporated carefully under reduced pressure. The crude product was distilled using a 30 cm Vigreux column at 70°C and 85 mbar to give 393.1g (3.27 mol, 81.4%) (R)-1,1-dimethoxy-2-propanol as a colorless liquid.

Analytical data: GC: 99.5%, ee: 99.9% (measured by chiral stationary phase GC),  $^1\text{H-NMR}$  ( $d^6$ -DMSO):  $\delta$  4.55 (bs, 1H), 3.98 (d, J = 5.8 Hz, 1H), 3.56 (dq, J = 6.4, 5.8 Hz, 1H), 3.30 (s, 6H), 1.00 (d, J = 6.4 Hz, 3H).

### 3. GC – Chemical purity of (S)-1,1-Dimethoxy-2-propanol

#### 768936 (S)-1,1-Dimethoxy-2-propanol

Lot Number: **BCBN5894** Sample Name: **0000000481198\_001\_GC**

| Agilent 6890N (536GC34)  |                                      |                                |                 |
|--------------------------|--------------------------------------|--------------------------------|-----------------|
| <b>Injector:</b>         | 250 °C                               | <b>GC Serial Number:</b>       | CN10628006      |
| <b>Detector (FID):</b>   | 280 °C                               | <b>Injection Time:</b>         | 11.12.14 18:39  |
| <b>Carrier gas:</b>      | Helium                               | <b>Sample Type:</b>            | unknown         |
| <b>Column flow:</b>      | 1.8 ml/min                           | <b>Channel:</b>                | GC_1            |
| <b>Temp. Control:</b>    | see Figure 1                         | <b>Sequence Creation Time:</b> | 01.12.14 15:22  |
| <b>Split Ratio:</b>      | 100:1                                | <b>Sequence Created By:</b>    | Patrick Stocker |
| <b>Range:</b>            | 0                                    | <b>Time Processed:</b>         | 15.12.14 15:28  |
| <b>Injection Volume:</b> | 1.0 ul                               | <b>Processed By:</b>           | Patrick Stocker |
| <b>Vial Number:</b>      | 13                                   |                                |                 |
| <b>Run Time:</b>         | 20.00 min                            |                                |                 |
| <b>Column:</b>           | Supelcowax 10 (30m x 0.25mm, 0.50um) |                                |                 |
| <b>Sample Prep.:</b>     | 50 ul in 1 ml THF                    |                                |                 |

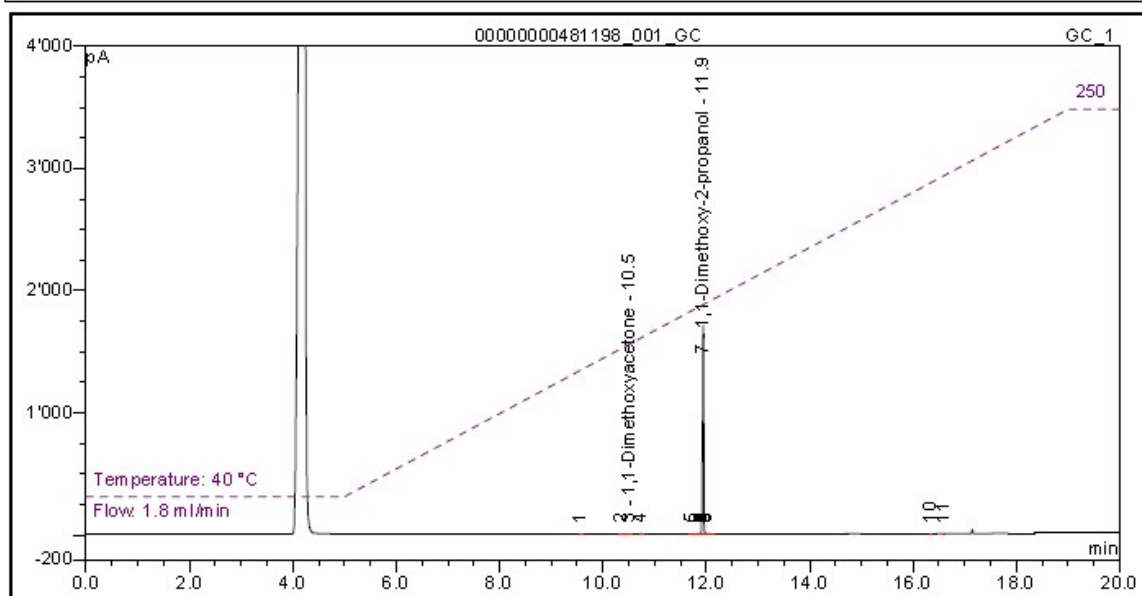

Figure 1: Zoomed Chromatogram and Temperatur Program

| No.           | Ret. Time min | Peak Name       | Type | Height pA        | Area pA*min    | Amount w/w% | Rel. Area %    |
|---------------|---------------|-----------------|------|------------------|----------------|-------------|----------------|
| 1             | 9.580         | n.a.            | BMB  | 0.8150           | 0.0236         | n.a.        | 0.05           |
| 2             | 10.368        | n.a.            | BMB* | 0.2926           | 0.0086         | n.a.        | 0.02           |
| 3             | 10.511        | 1,1-Dimethoxya  | BMB  | 1.1917           | 0.0306         | n.a.        | 0.07           |
| 4             | 10.745        | n.a.            | BMB  | 0.9974           | 0.0264         | n.a.        | 0.06           |
| 5             | 11.730        | n.a.            | BMB* | 0.3021           | 0.0086         | n.a.        | 0.02           |
| 6             | 11.829        | n.a.            | BMB* | 0.5230           | 0.0132         | n.a.        | 0.03           |
| 7             | 11.941        | 1,1-Dimethoxy-2 | BM * | 1703.0924        | 45.6646        | n.a.        | 99.49          |
| 8             | 11.981        | n.a.            | M *  | 4.0453           | 0.0769         | n.a.        | 0.17           |
| 9             | 12.015        | n.a.            | MB*  | 0.7793           | 0.0291         | n.a.        | 0.06           |
| 10            | 16.339        | n.a.            | BMB* | 0.4749           | 0.0102         | n.a.        | 0.02           |
| 11            | 16.595        | n.a.            | BMB* | 0.4310           | 0.0091         | n.a.        | 0.02           |
| <b>Total:</b> |               |                 |      | <b>1712.9447</b> | <b>45.9009</b> |             | <b>100.000</b> |

#### 4. NMR of (S)-1,1-Dimethoxy-2-propanol

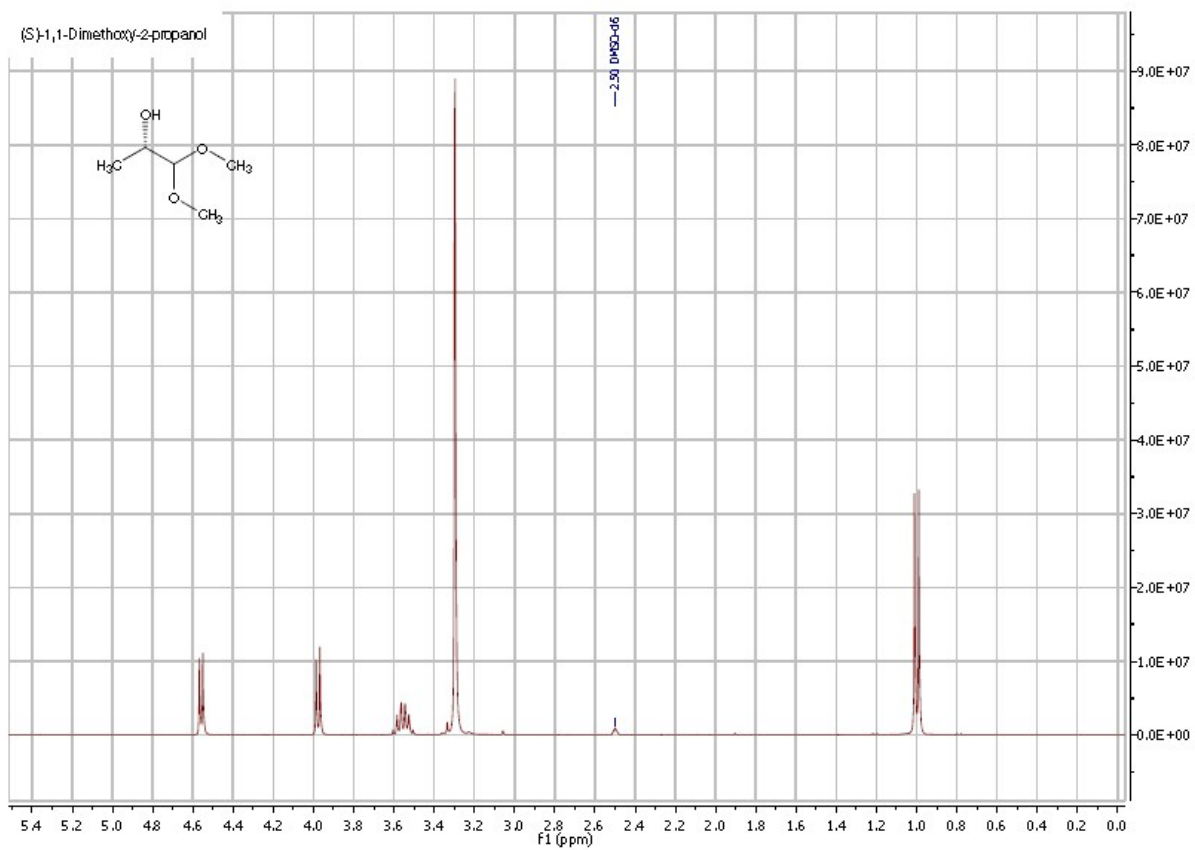

## 5. Enantiomeric purity analysis of (S)- and (R)-1,1-Dimethoxy-2-propanol by GC

### 768936 (S)-1,1-Dimethoxy-2-propanol

| Lot                  | BCBN5894                                    | Sample:                | 00000000481198_001_ER |
|----------------------|---------------------------------------------|------------------------|-----------------------|
| Injector (SSI, °C)   | 250                                         | Channel:               | GC_1                  |
| Detector (FID, °C)   | 250                                         | Vial Number:           | 23                    |
| Carriergas:          | Helium                                      | Injection Volume [µl]: | 1.0                   |
| Column Flow (ml/min) | 1.0                                         | Range:                 | -                     |
| Split ratio:         | 100:1                                       | Run Time (min):        | 20.00                 |
| Quantif. Method:     | 768936                                      | Recording Time:        | 15.12.14 07:53        |
| Column:              | Supelco beta-DEX 110 30 m x 0.25 mm 0.25 µm |                        |                       |

Sample Preparation 10 ul in 1.5 ml TBME

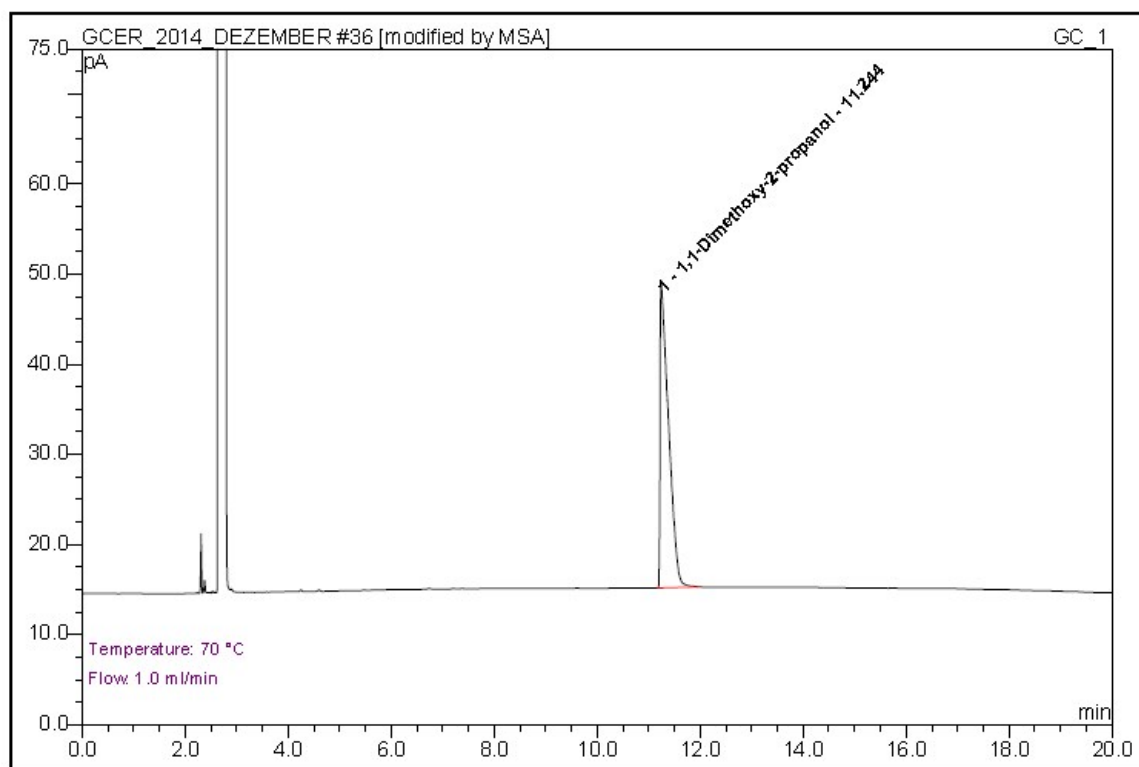

| No.           | Ret.Time min | Peak Name     | Height pA | Area pA*min | Type | Amount | Rel.Area % |
|---------------|--------------|---------------|-----------|-------------|------|--------|------------|
| 1             | 11.24        | 1,1-Dimethoxy | 34.107    | 6.4481      | BMB* | n.a.   | 100.000    |
| <b>Total:</b> |              |               | 34.107    | 6.4481      | 0.00 | 0.000  | 100.000    |

**768928 (R)-1,1-Dimethoxy-2-propanol**

**Lot**                    **BCBM8110**                    **Sample:**                    00000000494930\_001\_ER

|                      |                                             |                        |                |
|----------------------|---------------------------------------------|------------------------|----------------|
| Injector (SSI, °C)   | 250                                         | Channel:               | GC_1           |
| Detector (FID, °C)   | 250                                         | Vial Number:           | 24             |
| Carriergas:          | Helium                                      | Injection Volume [µl]: | 1.0            |
| Column Flow (ml/min) | 1.0                                         | Range:                 | -              |
| Split ratio:         | 100:1                                       | Run Time (min):        | 20.00          |
| Quantif. Method:     | 768928                                      | Recording Time:        | 15.12.14 08:15 |
| Column:              | Supelco beta-DEX 110 30 m x 0.25 mm 0.25 µm |                        |                |

Sample Preparation    10 ul in 1.5 ml TBME

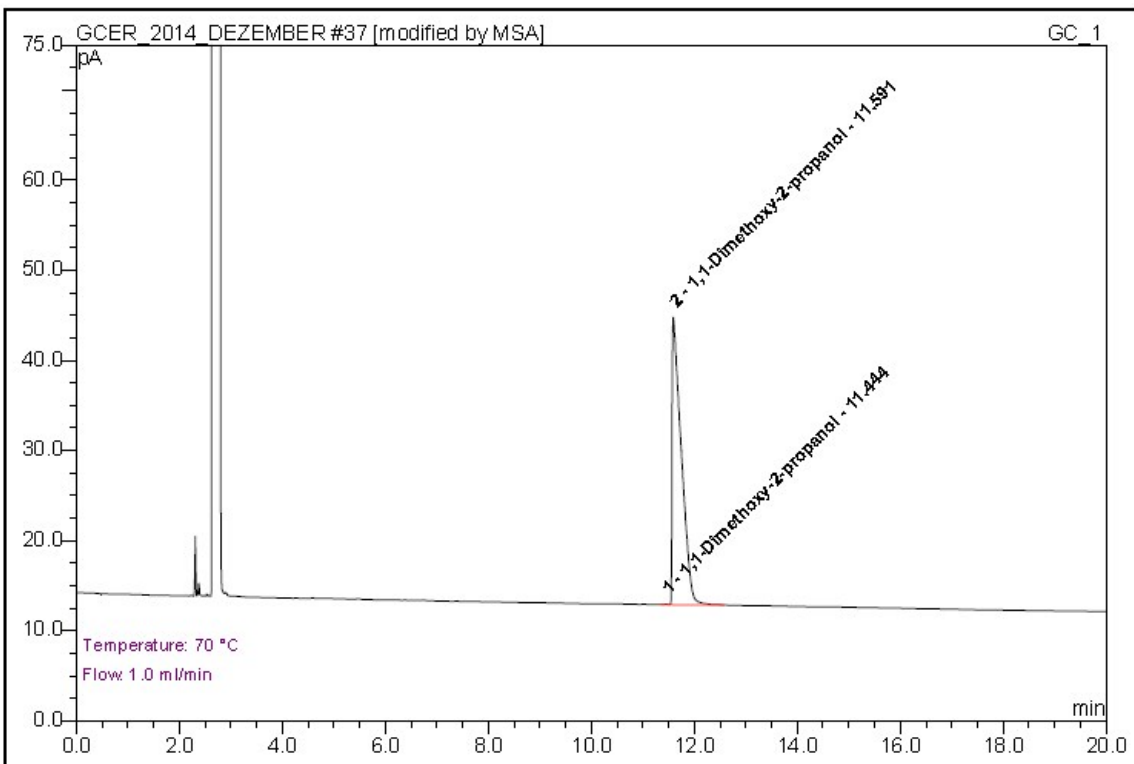

| No.           | Ret. Time min | Peak Name     | Height pA | Area pA*min | Type | Amount | Rel. Area % |
|---------------|---------------|---------------|-----------|-------------|------|--------|-------------|
| 1             | 11.44         | 1,1-Dimethoxy | 0.053     | 0.0043      | BMb* | n.a.   | 0.066       |
| 2             | 11.59         | 1,1-Dimethoxy | 31.915    | 6.5334      | bMB* | n.a.   | 99.934      |
| <b>Total:</b> |               |               | 31.968    | 6.5377      | 0.00 | 0.000  | 100.000     |

## 6. <sup>1</sup>H-NMR of (R)-Lactaldehyde

42418 D-Lactaldehyde ~1M in H<sub>2</sub>O  
1H-NMR in D<sub>2</sub>O  
FJ02.600.130.fid  
02.10.2014

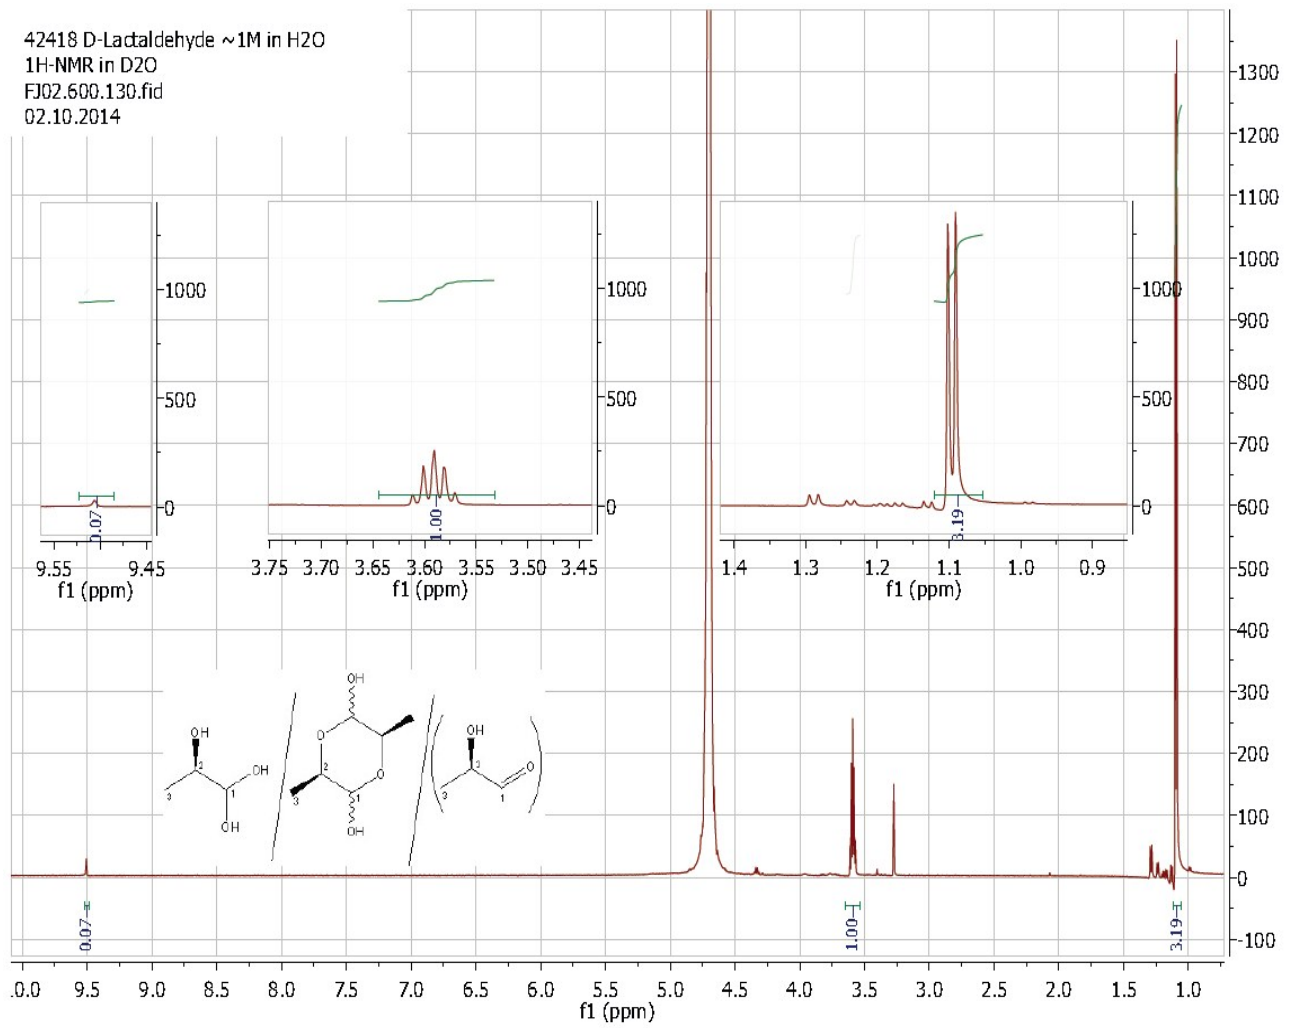



### 7. Stability of (R)-Lactaldehyde by $^1\text{H-NMR}$ , signal of methyl group

| storage,<br>r.t. | aqueous solution | neat compound |
|------------------|------------------|---------------|
| 1 day            |                  |               |
| 4 days           |                  |               |
| 21 days          |                  |               |



## 8. $^{13}\text{C}$ -NMR of (R)-Lactaldehyde

42418 D-Lactaldehyde ~1M in H<sub>2</sub>O  
13C-NMR in D<sub>2</sub>O  
FL12-600.211.fid  
03.12.2014

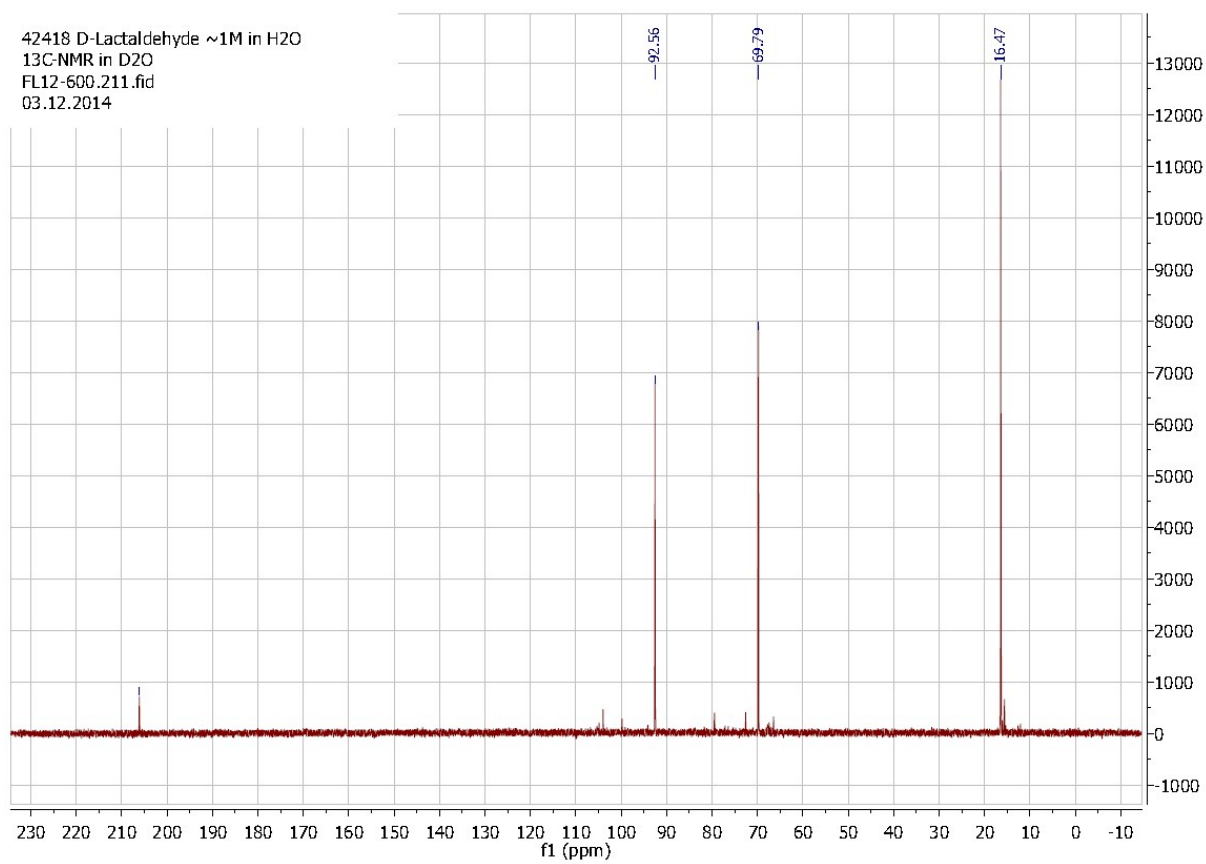

9. Enantiomeric purity analysis of (S)- and (R)-lactaldehyde as its dinitrophenylhydrazone derivatives by HPLC

47014 L-Lactaldehyde solution (as its DNPH derivative)

Lot Number: BA

Sample Name: T23584\_002

Dionex Summit (536LC25)

|                                                             |                                       |
|-------------------------------------------------------------|---------------------------------------|
| <b>Pump :</b> P680                                          | <b>Injection Time:</b> 03.11.14 15:55 |
| <b>Autosampler:</b> ASI-100                                 | <b>Processed By:</b> Hansjoerg Tinner |
| <b>Detector:</b> UVD 340U                                   | <b>Vial Number:</b> GA4               |
| <b>Column:</b> Daicel Chiralcel OD, 5 um (S/N: n.a.)        | <b>Sample Type:</b> unknown           |
| <b>Column Dim.:</b> 250 mm x 4.6 mm                         |                                       |
| <b>Mobile Phase:</b>                                        | <b>Injection Volume:</b> 10.0 µl      |
| %A : 0 %                                                    | <b>Flow:</b> 1.00 ml/min              |
| %B : 0 %                                                    | <b>Column Temp. (°C):</b> 25.0        |
| %C : 2-Propanol 15 %                                        | <b>Run Time:</b> 36.00 min            |
| %D : Hexan 85 %                                             |                                       |
| <b>Gradient :</b> iso                                       |                                       |
| <b>Sample Prep.:</b> 2 mg in 10 ml 2-Propanol : Hexan 2 : 8 |                                       |

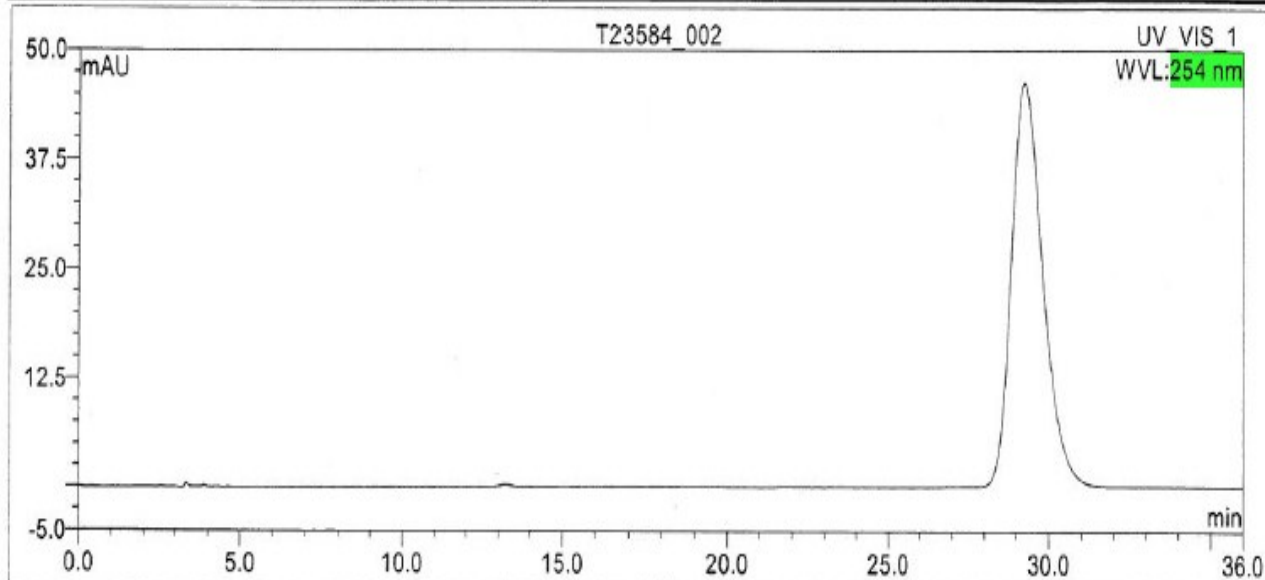

Figure 1: Auto-Scaled Chromatogram

42418 D-Lactaldehyde solution (as its DNPH derivative)

Lot Number: BA

Sample Name: T23583\_002

Dionex Summit (536LC25)

**Pump:** P680  
**Autosampler:** ASI-100  
**Detector:** UVD 340U  
**Column:** Daicel Chiralcel OD, 5  $\mu$ m (S/N: n.a.)  
**Column Dim.:** 250 mm x 4.6 mm  
**Mobile Phase:**  
    %A: 0 %  
    %B: 0 %  
    %C: 2-Propanol 15 %  
    %D: Hexan 85 %  
**Gradient:** iso  
**Sample Prep.:** 2 mg in 10 ml 2-Propanol : Hexan 2 : 8

**Injection Time:** 03.11.14 16:32  
**Processed By:** Hansjoerg Tinner  
**Vial Number:** GA6  
**Sample Type:** unknown  
**Injection Volume:** 10.0  $\mu$ l  
**Flow:** 1.00 ml/min  
**Column Temp. (°C):** 25.0  
**Run Time:** 36.00 min

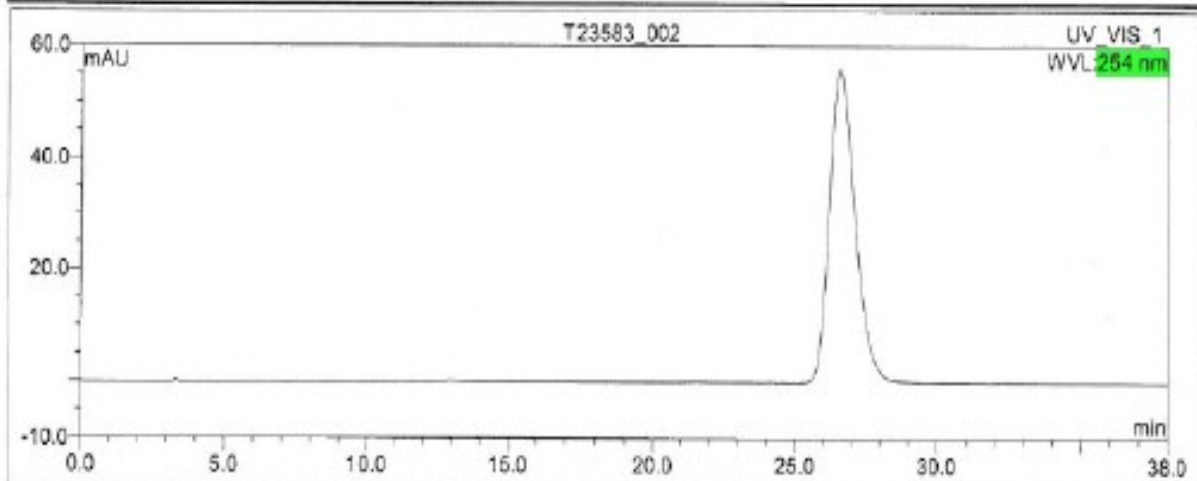

Figure 1: Auto-Scaled Chromatogram

49426 DL-Lactaldehyde solution (as its DNPH derivative)

Lot Number: BA

Sample Name:

Dionex Summit (536LC25)

Pump : P680

Autosampler: ASI-100

Detector: UVD 340U

Column: Daicel Chiralcel OD, 5  $\mu$ m (S/N: n.a.)

Column Dim.: 250 mm x 4.6 mm

Mobile Phase:

%A : 0 %

%B : 0 %

%C : 2-Propanol 15 %

%D : Hexan 85 %

Gradient : iso

Sample Prep.: 2 mg in 10 ml 2-Propanol : Hexan 2 : 8

Injection Time: 03.11.14 17:10

Processed By: Hansjoerg Tinner

Vial Number: GA3

Sample Type: unknown

Injection Volume: 10.0  $\mu$ l

Flow: 1.00 ml/min

Column Temp. (°C): 25.0

Run Time: 38.00 min

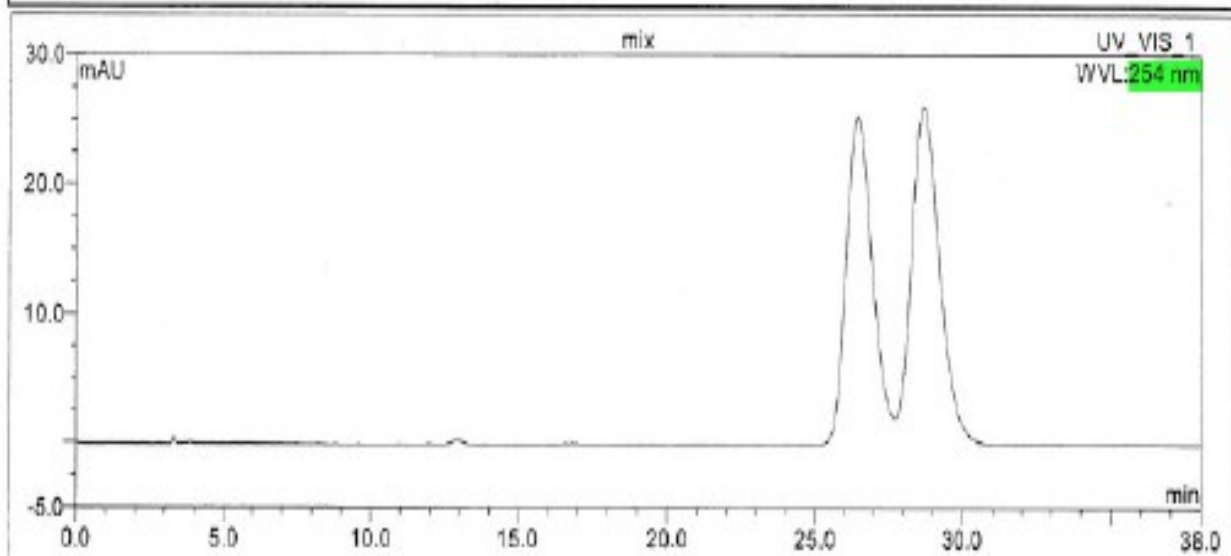

Figure 1: Auto-Scaled Chromatogram

## 10. DoE Parameter Investigation

Design: 2 Level Factorial including 4 center points

Parameters Varied:     Substrate loading from 150g/L – 250g/L  
                              NADPH loading from 0.01g/L – 0.1g/L  
                              Temperature from 30°C – 40°C  
                              Buffer concentration from 0.04 Mol/L – 0.15 Mol/L

Responses:                Conversion 5.5h  
                              Conversion 20.5h  
                              Conversion 28h

3D Surface Plot - Optimum conversion profile at time point 28h:

Design-Expert® Software  
Factor Coding: Actual  
Original Scale  
(median estimates)  
conv. 28h  
99.7  
41.5  
X1 = A: temperature  
X2 = B: substrate loading  
Actual Factors  
C: NADP loading = 0.05  
D: buffer concentration = 0.15

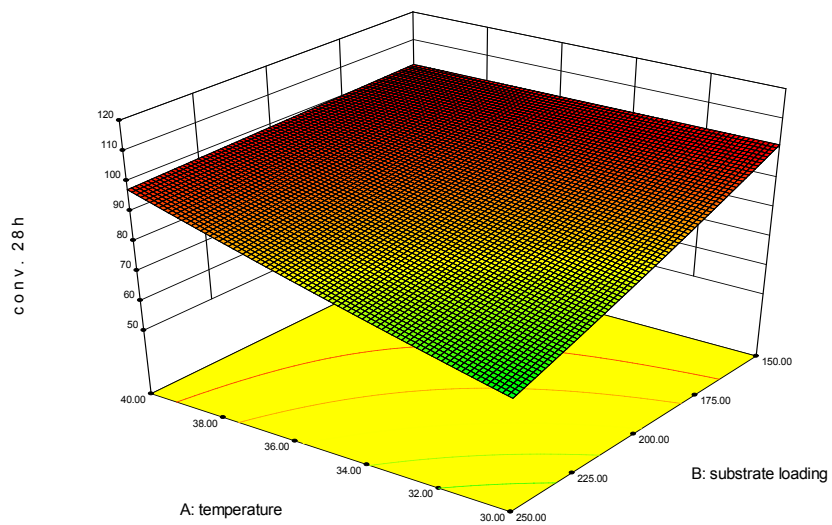

Supplement: c5re00009b1.pdf [file c5re00009b1.pdf]
